# Supplementary material for: Personalized goals of people living with dementia and family carers: A content analysis of goals set within an individually tailored psychosocial intervention trial
Source: PubMed Central journal article supplement (PMC11247364; doi:10.1002/trc2.12493), 2024-07-15
Supplement: TRC2-10-e12493-s002.pdf [file TRC2-10-e12493-s002.pdf]

## ICMJE DISCLOSURE FORM

**Date:** 17/05/2024

**Your Name:** Jessica Budgett

**Manuscript Title:** Personalised goals of people living with dementia and family carers: a content analysis of goals set within an individually tailored psychosocial intervention trial.

**Manuscript number (if known):** TRCI-D-23-00105

In the interest of transparency, we ask you to disclose all relationships/activities/interests listed below that are related to the content of your manuscript. “Related” means any relation with for-profit or not-for-profit third parties whose interests may be affected by the content of the manuscript. Disclosure represents a commitment to transparency and does not necessarily indicate a bias. If you are in doubt about whether to list a relationship/activity/interest, it is preferable that you do so.

The following questions apply to the author’s relationships/activities/interests as they relate to the current manuscript only.

The author’s relationships/activities/interests should be defined broadly. For example, if your manuscript pertains to the epidemiology of hypertension, you should declare all relationships with manufacturers of antihypertensive medication, even if that medication is not mentioned in the manuscript.

In item #1 below, report all support for the work reported in this manuscript without time limit. For all other items, the time frame for disclosure is the past 36 months.

|                                                           |                                                                                                                                                                                | Name all entities with whom you have this relationship or indicate none (add rows as needed) | Specifications/Comments (e.g., if payments were made to you or to your institution) |
|-----------------------------------------------------------|--------------------------------------------------------------------------------------------------------------------------------------------------------------------------------|----------------------------------------------------------------------------------------------|-------------------------------------------------------------------------------------|
| <b>Time frame: Since the initial planning of the work</b> |                                                                                                                                                                                |                                                                                              |                                                                                     |
| 1                                                         | All support for the present manuscript (e.g., funding, provision of study materials, medical writing, article processing charges, etc.)<br><b>No time limit for this item.</b> | Alzheimer’s Society [Grant number 330, AS-PR2-16-002)].                                      | Paid to institution                                                                 |
|                                                           |                                                                                                                                                                                |                                                                                              |                                                                                     |
|                                                           |                                                                                                                                                                                |                                                                                              |                                                                                     |
|                                                           |                                                                                                                                                                                |                                                                                              |                                                                                     |
|                                                           |                                                                                                                                                                                |                                                                                              |                                                                                     |
|                                                           |                                                                                                                                                                                |                                                                                              |                                                                                     |
| <b>Time frame: past 36 months</b>                         |                                                                                                                                                                                |                                                                                              |                                                                                     |
| 2                                                         | Grants or contracts from any entity (if not indicated in item #1 above).                                                                                                       | <input checked="" type="checkbox"/> None                                                     |                                                                                     |
|                                                           |                                                                                                                                                                                |                                                                                              |                                                                                     |
| 3                                                         | Royalties or licenses                                                                                                                                                          | <input checked="" type="checkbox"/> None                                                     |                                                                                     |
|                                                           |                                                                                                                                                                                |                                                                                              |                                                                                     |

|    |                                                                                                              |                   |  |
|----|--------------------------------------------------------------------------------------------------------------|-------------------|--|
|    |                                                                                                              |                   |  |
| 4  | Consulting fees                                                                                              | <u>  X  </u> None |  |
|    |                                                                                                              |                   |  |
|    |                                                                                                              |                   |  |
| 5  | Payment or honoraria for lectures, presentations, speakers bureaus, manuscript writing or educational events | <u>  X  </u> None |  |
|    |                                                                                                              |                   |  |
|    |                                                                                                              |                   |  |
| 6  | Payment for expert testimony                                                                                 | <u>  X  </u> None |  |
|    |                                                                                                              |                   |  |
|    |                                                                                                              |                   |  |
| 7  | Support for attending meetings and/or travel                                                                 | <u>  X  </u> None |  |
|    |                                                                                                              |                   |  |
|    |                                                                                                              |                   |  |
| 8  | Patents planned, issued or pending                                                                           | <u>  X  </u> None |  |
|    |                                                                                                              |                   |  |
|    |                                                                                                              |                   |  |
| 9  | Participation on a Data Safety Monitoring Board or Advisory Board                                            | <u>  X  </u> None |  |
|    |                                                                                                              |                   |  |
|    |                                                                                                              |                   |  |
| 10 | Leadership or fiduciary role in other board, society, committee or advocacy group, paid or unpaid            | <u>  X  </u> None |  |
|    |                                                                                                              |                   |  |
|    |                                                                                                              |                   |  |
| 11 | Stock or stock options                                                                                       | <u>  X  </u> None |  |
|    |                                                                                                              |                   |  |
|    |                                                                                                              |                   |  |
| 12 | Receipt of equipment, materials, drugs, medical writing, gifts or other services                             | <u>  X  </u> None |  |
|    |                                                                                                              |                   |  |
|    |                                                                                                              |                   |  |
| 13 | Other financial or non-financial interests                                                                   | <u>  X  </u> None |  |
|    |                                                                                                              |                   |  |
|    |                                                                                                              |                   |  |

Please place an "X" next to the following statement to indicate your agreement:

  X   I certify that I have answered every question and have not altered the wording of any of the questions on this form.

## ICMJE DISCLOSURE FORM

**Date:** 17/05/2024

**Your Name:** Andrew Sommerlad

**Manuscript Title:** Personalised goals of people living with dementia and family carers: a content analysis of goals set within an individually tailored psychosocial intervention trial.

**Manuscript number (if known):** \_ TRCI-D-23-00105

In the interest of transparency, we ask you to disclose all relationships/activities/interests listed below that are related to the content of your manuscript. “Related” means any relation with for-profit or not-for-profit third parties whose interests may be affected by the content of the manuscript. Disclosure represents a commitment to transparency and does not necessarily indicate a bias. If you are in doubt about whether to list a relationship/activity/interest, it is preferable that you do so.

The following questions apply to the author’s relationships/activities/interests as they relate to the current manuscript only.

The author’s relationships/activities/interests should be defined broadly. For example, if your manuscript pertains to the epidemiology of hypertension, you should declare all relationships with manufacturers of antihypertensive medication, even if that medication is not mentioned in the manuscript.

In item #1 below, report all support for the work reported in this manuscript without time limit. For all other items, the time frame for disclosure is the past 36 months.

|                                                           |                                                                                                                                                                                | Name all entities with whom you have this relationship or indicate none (add rows as needed)                 | Specifications/Comments (e.g., if payments were made to you or to your institution) |
|-----------------------------------------------------------|--------------------------------------------------------------------------------------------------------------------------------------------------------------------------------|--------------------------------------------------------------------------------------------------------------|-------------------------------------------------------------------------------------|
| <b>Time frame: Since the initial planning of the work</b> |                                                                                                                                                                                |                                                                                                              |                                                                                     |
| 1                                                         | All support for the present manuscript (e.g., funding, provision of study materials, medical writing, article processing charges, etc.)<br><b>No time limit for this item.</b> | <input checked="" type="checkbox"/> None                                                                     |                                                                                     |
|                                                           |                                                                                                                                                                                |                                                                                                              |                                                                                     |
|                                                           |                                                                                                                                                                                |                                                                                                              |                                                                                     |
|                                                           |                                                                                                                                                                                |                                                                                                              |                                                                                     |
|                                                           |                                                                                                                                                                                |                                                                                                              |                                                                                     |
|                                                           |                                                                                                                                                                                |                                                                                                              |                                                                                     |
| <b>Time frame: past 36 months</b>                         |                                                                                                                                                                                |                                                                                                              |                                                                                     |
| 2                                                         | Grants or contracts from any entity (if not indicated in item #1 above).                                                                                                       | Wellcome Trust Clinical Research Career Development Fellowship (222932/Z/21/Z)                               | Payment made to my institution (UCL)                                                |
|                                                           |                                                                                                                                                                                | Alzheimer's Association & Brain Canada. Advancing Research on Care and Outcome Measurement (ARCOM-22-875327) | Payment made to my institution (UCL)                                                |
|                                                           |                                                                                                                                                                                |                                                                                                              |                                                                                     |
| 3                                                         | Royalties or licenses                                                                                                                                                          | <input checked="" type="checkbox"/> None                                                                     |                                                                                     |

|    |                                                                                                              |                   |  |
|----|--------------------------------------------------------------------------------------------------------------|-------------------|--|
|    |                                                                                                              |                   |  |
| 4  | Consulting fees                                                                                              | <u>  X  </u> None |  |
|    |                                                                                                              |                   |  |
| 5  | Payment or honoraria for lectures, presentations, speakers bureaus, manuscript writing or educational events | <u>  X  </u> None |  |
|    |                                                                                                              |                   |  |
| 6  | Payment for expert testimony                                                                                 | <u>  X  </u> None |  |
|    |                                                                                                              |                   |  |
| 7  | Support for attending meetings and/or travel                                                                 | <u>  X  </u> None |  |
|    |                                                                                                              |                   |  |
| 8  | Patents planned, issued or pending                                                                           | <u>  X  </u> None |  |
|    |                                                                                                              |                   |  |
| 9  | Participation on a Data Safety Monitoring Board or Advisory Board                                            | <u>  X  </u> None |  |
|    |                                                                                                              |                   |  |
| 10 | Leadership or fiduciary role in other board, society, committee or advocacy group, paid or unpaid            | <u>  X  </u> None |  |
|    |                                                                                                              |                   |  |
| 11 | Stock or stock options                                                                                       | <u>  X  </u> None |  |
|    |                                                                                                              |                   |  |
| 12 | Receipt of equipment, materials, drugs, medical writing, gifts or other services                             | <u>  X  </u> None |  |
|    |                                                                                                              |                   |  |
| 13 | Other financial or non-financial interests                                                                   | <u>  X  </u> None |  |
|    |                                                                                                              |                   |  |

Please place an "X" next to the following statement to indicate your agreement:

  X   I certify that I have answered every question and have not altered the wording of any of the questions on this form.

## ICMJE DISCLOSURE FORM

**Date:** 17/05/2024

**Your Name:** Nuriye Kupeli

**Manuscript Title:** Personalised goals of people living with dementia and family carers: a content analysis of goals set within an individually tailored psychosocial intervention trial.

**Manuscript number (if known):**\_\_ TRCI-D-23-00105

In the interest of transparency, we ask you to disclose all relationships/activities/interests listed below that are related to the content of your manuscript. “Related” means any relation with for-profit or not-for-profit third parties whose interests may be affected by the content of the manuscript. Disclosure represents a commitment to transparency and does not necessarily indicate a bias. If you are in doubt about whether to list a relationship/activity/interest, it is preferable that you do so.

The following questions apply to the author’s relationships/activities/interests as they relate to the current manuscript only.

The author’s relationships/activities/interests should be defined broadly. For example, if your manuscript pertains to the epidemiology of hypertension, you should declare all relationships with manufacturers of antihypertensive medication, even if that medication is not mentioned in the manuscript.

In item #1 below, report all support for the work reported in this manuscript without time limit. For all other items, the time frame for disclosure is the past 36 months.

|                                                           |                                                                                                                                                                                | Name all entities with whom you have this relationship or indicate none (add rows as needed) | Specifications/Comments (e.g., if payments were made to you or to your institution) |
|-----------------------------------------------------------|--------------------------------------------------------------------------------------------------------------------------------------------------------------------------------|----------------------------------------------------------------------------------------------|-------------------------------------------------------------------------------------|
| <b>Time frame: Since the initial planning of the work</b> |                                                                                                                                                                                |                                                                                              |                                                                                     |
| 1                                                         | All support for the present manuscript (e.g., funding, provision of study materials, medical writing, article processing charges, etc.)<br><b>No time limit for this item.</b> | <input checked="" type="checkbox"/> None                                                     |                                                                                     |
|                                                           |                                                                                                                                                                                |                                                                                              |                                                                                     |
|                                                           |                                                                                                                                                                                |                                                                                              |                                                                                     |
|                                                           |                                                                                                                                                                                |                                                                                              |                                                                                     |
|                                                           |                                                                                                                                                                                |                                                                                              |                                                                                     |
|                                                           |                                                                                                                                                                                |                                                                                              |                                                                                     |
| <b>Time frame: past 36 months</b>                         |                                                                                                                                                                                |                                                                                              |                                                                                     |
| 2                                                         | Grants or contracts from any entity (if not indicated in item #1 above).                                                                                                       | Alzheimer’s Society Fellowship Grant (399 AS-JF-17b-016)                                     | Payment made to my institution (UCL)                                                |
|                                                           |                                                                                                                                                                                |                                                                                              |                                                                                     |

|    |                                                                                                              |                                          |  |
|----|--------------------------------------------------------------------------------------------------------------|------------------------------------------|--|
|    |                                                                                                              |                                          |  |
| 3  | Royalties or licenses                                                                                        | <input checked="" type="checkbox"/> None |  |
|    |                                                                                                              |                                          |  |
|    |                                                                                                              |                                          |  |
| 4  | Consulting fees                                                                                              | <input checked="" type="checkbox"/> None |  |
|    |                                                                                                              |                                          |  |
|    |                                                                                                              |                                          |  |
| 5  | Payment or honoraria for lectures, presentations, speakers bureaus, manuscript writing or educational events | <input checked="" type="checkbox"/> None |  |
|    |                                                                                                              |                                          |  |
|    |                                                                                                              |                                          |  |
| 6  | Payment for expert testimony                                                                                 | <input checked="" type="checkbox"/> None |  |
|    |                                                                                                              |                                          |  |
|    |                                                                                                              |                                          |  |
| 7  | Support for attending meetings and/or travel                                                                 | <input checked="" type="checkbox"/> None |  |
|    |                                                                                                              |                                          |  |
|    |                                                                                                              |                                          |  |
| 8  | Patents planned, issued or pending                                                                           | <input checked="" type="checkbox"/> None |  |
|    |                                                                                                              |                                          |  |
|    |                                                                                                              |                                          |  |
| 9  | Participation on a Data Safety Monitoring Board or Advisory Board                                            | <input checked="" type="checkbox"/> None |  |
|    |                                                                                                              |                                          |  |
|    |                                                                                                              |                                          |  |
| 10 | Leadership or fiduciary role in other board, society, committee or advocacy group, paid or unpaid            | <input checked="" type="checkbox"/> None |  |
|    |                                                                                                              |                                          |  |
|    |                                                                                                              |                                          |  |
| 11 | Stock or stock options                                                                                       | <input checked="" type="checkbox"/> None |  |
|    |                                                                                                              |                                          |  |
|    |                                                                                                              |                                          |  |
| 12 | Receipt of equipment, materials, drugs, medical writing, gifts or other services                             | <input checked="" type="checkbox"/> None |  |
|    |                                                                                                              |                                          |  |
|    |                                                                                                              |                                          |  |
| 13 | Other financial or non-financial interests                                                                   | <input checked="" type="checkbox"/> None |  |
|    |                                                                                                              |                                          |  |
|    |                                                                                                              |                                          |  |

Please place an "X" next to the following statement to indicate your agreement:

I certify that I have answered every question and have not altered the wording of any of the questions on this form.

## ICMJE DISCLOSURE FORM

**Date:** 17/05/2024

**Your Name:** Sedigheh Zabihi

**Manuscript Title:** Personalised goals of people living with dementia and family carers: a content analysis of goals set within an individually tailored psychosocial intervention trial.

**Manuscript number (if known):** \_ TRCI-D-23-00105

In the interest of transparency, we ask you to disclose all relationships/activities/interests listed below that are related to the content of your manuscript. “Related” means any relation with for-profit or not-for-profit third parties whose interests may be affected by the content of the manuscript. Disclosure represents a commitment to transparency and does not necessarily indicate a bias. If you are in doubt about whether to list a relationship/activity/interest, it is preferable that you do so.

The following questions apply to the author’s relationships/activities/interests as they relate to the current manuscript only.

The author’s relationships/activities/interests should be defined broadly. For example, if your manuscript pertains to the epidemiology of hypertension, you should declare all relationships with manufacturers of antihypertensive medication, even if that medication is not mentioned in the manuscript.

In item #1 below, report all support for the work reported in this manuscript without time limit. For all other items, the time frame for disclosure is the past 36 months.

|                                                           |                                                                                                                                                                                | Name all entities with whom you have this relationship or indicate none (add rows as needed) | Specifications/Comments (e.g., if payments were made to you or to your institution) |
|-----------------------------------------------------------|--------------------------------------------------------------------------------------------------------------------------------------------------------------------------------|----------------------------------------------------------------------------------------------|-------------------------------------------------------------------------------------|
| <b>Time frame: Since the initial planning of the work</b> |                                                                                                                                                                                |                                                                                              |                                                                                     |
| 1                                                         | All support for the present manuscript (e.g., funding, provision of study materials, medical writing, article processing charges, etc.)<br><b>No time limit for this item.</b> | Alzheimer’s Society [Grant number 330, AS-PR2-16-002)].                                      | Paid to the institution                                                             |
|                                                           |                                                                                                                                                                                |                                                                                              |                                                                                     |
|                                                           |                                                                                                                                                                                |                                                                                              |                                                                                     |
|                                                           |                                                                                                                                                                                |                                                                                              |                                                                                     |
|                                                           |                                                                                                                                                                                |                                                                                              |                                                                                     |
|                                                           |                                                                                                                                                                                |                                                                                              |                                                                                     |
| <b>Time frame: past 36 months</b>                         |                                                                                                                                                                                |                                                                                              |                                                                                     |
| 2                                                         | Grants or contracts from any entity (if not indicated in item #1 above).                                                                                                       | <u> X </u> None                                                                              |                                                                                     |
|                                                           |                                                                                                                                                                                |                                                                                              |                                                                                     |
| 3                                                         | Royalties or licenses                                                                                                                                                          | <u> X </u> None                                                                              |                                                                                     |
|                                                           |                                                                                                                                                                                |                                                                                              |                                                                                     |

|    |                                                                                                              |                   |  |
|----|--------------------------------------------------------------------------------------------------------------|-------------------|--|
|    |                                                                                                              |                   |  |
| 4  | Consulting fees                                                                                              | <u>  X  </u> None |  |
|    |                                                                                                              |                   |  |
|    |                                                                                                              |                   |  |
| 5  | Payment or honoraria for lectures, presentations, speakers bureaus, manuscript writing or educational events | <u>  X  </u> None |  |
|    |                                                                                                              |                   |  |
|    |                                                                                                              |                   |  |
| 6  | Payment for expert testimony                                                                                 | <u>  X  </u> None |  |
|    |                                                                                                              |                   |  |
|    |                                                                                                              |                   |  |
| 7  | Support for attending meetings and/or travel                                                                 | <u>  X  </u> None |  |
|    |                                                                                                              |                   |  |
|    |                                                                                                              |                   |  |
| 8  | Patents planned, issued or pending                                                                           | <u>  X  </u> None |  |
|    |                                                                                                              |                   |  |
|    |                                                                                                              |                   |  |
| 9  | Participation on a Data Safety Monitoring Board or Advisory Board                                            | <u>  X  </u> None |  |
|    |                                                                                                              |                   |  |
|    |                                                                                                              |                   |  |
| 10 | Leadership or fiduciary role in other board, society, committee or advocacy group, paid or unpaid            | <u>  X  </u> None |  |
|    |                                                                                                              |                   |  |
|    |                                                                                                              |                   |  |
| 11 | Stock or stock options                                                                                       | <u>  X  </u> None |  |
|    |                                                                                                              |                   |  |
|    |                                                                                                              |                   |  |
| 12 | Receipt of equipment, materials, drugs, medical writing, gifts or other services                             | <u>  X  </u> None |  |
|    |                                                                                                              |                   |  |
|    |                                                                                                              |                   |  |
| 13 | Other financial or non-financial interests                                                                   | <u>  X  </u> None |  |
|    |                                                                                                              |                   |  |
|    |                                                                                                              |                   |  |

Please place an "X" next to the following statement to indicate your agreement:

  X   I certify that I have answered every question and have not altered the wording of any of the questions on this form.



## ICMJE DISCLOSURE FORM

**Date:** 23/05/2024

**Your Name:** Kenneth Rockwood

**Manuscript Title:** Personalised goals of people living with dementia and family carers: a content analysis of goals set within an individually tailored psychosocial intervention trial.

**Manuscript number (if known):** \_ TRCI-D-23-00105

In the interest of transparency, we ask you to disclose all relationships/activities/interests listed below that are related to the content of your manuscript. “Related” means any relation with for-profit or not-for-profit third parties whose interests may be affected by the content of the manuscript. Disclosure represents a commitment to transparency and does not necessarily indicate a bias. If you are in doubt about whether to list a relationship/activity/interest, it is preferable that you do so.

The following questions apply to the author’s relationships/activities/interests as they relate to the current manuscript only.

The author’s relationships/activities/interests should be defined broadly. For example, if your manuscript pertains to the epidemiology of hypertension, you should declare all relationships with manufacturers of antihypertensive medication, even if that medication is not mentioned in the manuscript.

In item #1 below, report all support for the work reported in this manuscript without time limit. For all other items, the time frame for disclosure is the past 36 months.

|                                                           |                                                                                                                                                                                | Name all entities with whom you have this relationship or indicate none (add rows as needed) | Specifications/Comments (e.g., if payments were made to you or to your institution)                                                                                                                                                  |
|-----------------------------------------------------------|--------------------------------------------------------------------------------------------------------------------------------------------------------------------------------|----------------------------------------------------------------------------------------------|--------------------------------------------------------------------------------------------------------------------------------------------------------------------------------------------------------------------------------------|
| <b>Time frame: Since the initial planning of the work</b> |                                                                                                                                                                                |                                                                                              |                                                                                                                                                                                                                                      |
| 1                                                         | All support for the present manuscript (e.g., funding, provision of study materials, medical writing, article processing charges, etc.)<br><b>No time limit for this item.</b> | __X__ None                                                                                   |                                                                                                                                                                                                                                      |
|                                                           |                                                                                                                                                                                |                                                                                              |                                                                                                                                                                                                                                      |
|                                                           |                                                                                                                                                                                |                                                                                              |                                                                                                                                                                                                                                      |
|                                                           |                                                                                                                                                                                |                                                                                              |                                                                                                                                                                                                                                      |
|                                                           |                                                                                                                                                                                |                                                                                              |                                                                                                                                                                                                                                      |
| <b>Time frame: past 36 months</b>                         |                                                                                                                                                                                |                                                                                              |                                                                                                                                                                                                                                      |
| 2                                                         | Grants or contracts from any entity (if not indicated in item #1 above).                                                                                                       | __X__ None                                                                                   |                                                                                                                                                                                                                                      |
|                                                           |                                                                                                                                                                                |                                                                                              |                                                                                                                                                                                                                                      |
| 3                                                         | Royalties or licenses                                                                                                                                                          | __X__ None                                                                                   | Although not directly related to the submitted work, KR has asserted copyright over the Clinical Frailty Scale and (with Olga Theou) the Pictorial Fit-Frail Scale, which are made freely available for non-commercial education and |

|    |                                                                                                              |                   |                                                                                                                                                                                                                                                                                                                                                                                                                                                                                                                                                                                                                                                                                                                            |
|----|--------------------------------------------------------------------------------------------------------------|-------------------|----------------------------------------------------------------------------------------------------------------------------------------------------------------------------------------------------------------------------------------------------------------------------------------------------------------------------------------------------------------------------------------------------------------------------------------------------------------------------------------------------------------------------------------------------------------------------------------------------------------------------------------------------------------------------------------------------------------------------|
|    |                                                                                                              |                   | research , as well as non-profit health care with completion of a permission agreement stipulating users will not change, charge for or commercialize the scales. For-profit entities (including pharma) pay a licensing fee, 15% of which is retained by the Dalhousie University Office of Commercialization and Innovation Engagement. After taxes, the remainder of the license fees are donated to the Dalhousie Medical Research Foundation. In the past three years licenses have been negotiated with Rebibus Therapeutics Inc., Cook Research Incorporated, W.L. Gore Associates Inc, Pfizer Inc, Cellcolabs AB, AstraZeneca Uk Limited, Qu Biologics Inc, Biotest AG, BioAge Labs Inc, Congenica, Icosavax, Inc. |
|    |                                                                                                              |                   |                                                                                                                                                                                                                                                                                                                                                                                                                                                                                                                                                                                                                                                                                                                            |
|    |                                                                                                              |                   |                                                                                                                                                                                                                                                                                                                                                                                                                                                                                                                                                                                                                                                                                                                            |
| 4  | Consulting fees                                                                                              | <u>  X  </u> None |                                                                                                                                                                                                                                                                                                                                                                                                                                                                                                                                                                                                                                                                                                                            |
|    |                                                                                                              |                   |                                                                                                                                                                                                                                                                                                                                                                                                                                                                                                                                                                                                                                                                                                                            |
|    |                                                                                                              |                   |                                                                                                                                                                                                                                                                                                                                                                                                                                                                                                                                                                                                                                                                                                                            |
| 5  | Payment or honoraria for lectures, presentations, speakers bureaus, manuscript writing or educational events | <u>  X  </u> None | Although not directly related to the submitted work, in the past three years KR has received honoraria for invited lectures, rounds and academic symposia on frailty from: Burnaby Family Practice, United Arab Emirates University, Singapore National Research Foundation, University of British Columbia, McMaster University, Chinese Medical Association, University of Omaha, the Australia New Zealand Society of Geriatric Medicine, the Atria Institute, and the Fraser Health Authority.                                                                                                                                                                                                                         |
|    |                                                                                                              |                   |                                                                                                                                                                                                                                                                                                                                                                                                                                                                                                                                                                                                                                                                                                                            |
|    |                                                                                                              |                   |                                                                                                                                                                                                                                                                                                                                                                                                                                                                                                                                                                                                                                                                                                                            |
| 6  | Payment for expert testimony                                                                                 | <u>  X  </u> None |                                                                                                                                                                                                                                                                                                                                                                                                                                                                                                                                                                                                                                                                                                                            |
|    |                                                                                                              |                   |                                                                                                                                                                                                                                                                                                                                                                                                                                                                                                                                                                                                                                                                                                                            |
|    |                                                                                                              |                   |                                                                                                                                                                                                                                                                                                                                                                                                                                                                                                                                                                                                                                                                                                                            |
| 7  | Support for attending meetings and/or travel                                                                 | <u>  X  </u> None |                                                                                                                                                                                                                                                                                                                                                                                                                                                                                                                                                                                                                                                                                                                            |
|    |                                                                                                              |                   |                                                                                                                                                                                                                                                                                                                                                                                                                                                                                                                                                                                                                                                                                                                            |
|    |                                                                                                              |                   |                                                                                                                                                                                                                                                                                                                                                                                                                                                                                                                                                                                                                                                                                                                            |
| 8  | Patents planned, issued or pending                                                                           | <u>  X  </u> None |                                                                                                                                                                                                                                                                                                                                                                                                                                                                                                                                                                                                                                                                                                                            |
|    |                                                                                                              |                   |                                                                                                                                                                                                                                                                                                                                                                                                                                                                                                                                                                                                                                                                                                                            |
|    |                                                                                                              |                   |                                                                                                                                                                                                                                                                                                                                                                                                                                                                                                                                                                                                                                                                                                                            |
| 9  | Participation on a Data Safety Monitoring Board or Advisory Board                                            | <u>  X  </u> None | Although not directly related to the submitted work, KR currently serves on a data safety monitoring board for EpiPharma Inc. In the past three years has served as a member of the ADMET-2 advisory board (Johns Hopkins), and the Wake Forest University Medical School Centre advisory board.                                                                                                                                                                                                                                                                                                                                                                                                                           |
|    |                                                                                                              |                   |                                                                                                                                                                                                                                                                                                                                                                                                                                                                                                                                                                                                                                                                                                                            |
|    |                                                                                                              |                   |                                                                                                                                                                                                                                                                                                                                                                                                                                                                                                                                                                                                                                                                                                                            |
| 10 | Leadership or fiduciary role in other board, society,                                                        | <u>  X  </u> None |                                                                                                                                                                                                                                                                                                                                                                                                                                                                                                                                                                                                                                                                                                                            |
|    |                                                                                                              |                   |                                                                                                                                                                                                                                                                                                                                                                                                                                                                                                                                                                                                                                                                                                                            |

|    |                                                                                  |                 |                                                                                                                                                                                                                                                                                                                                                                                                 |
|----|----------------------------------------------------------------------------------|-----------------|-------------------------------------------------------------------------------------------------------------------------------------------------------------------------------------------------------------------------------------------------------------------------------------------------------------------------------------------------------------------------------------------------|
|    | committee or advocacy group, paid or unpaid                                      |                 |                                                                                                                                                                                                                                                                                                                                                                                                 |
| 11 | Stock or stock options                                                           | <u> X </u> None |                                                                                                                                                                                                                                                                                                                                                                                                 |
|    |                                                                                  |                 |                                                                                                                                                                                                                                                                                                                                                                                                 |
|    |                                                                                  |                 |                                                                                                                                                                                                                                                                                                                                                                                                 |
| 12 | Receipt of equipment, materials, drugs, medical writing, gifts or other services | <u> X </u> None |                                                                                                                                                                                                                                                                                                                                                                                                 |
|    |                                                                                  |                 |                                                                                                                                                                                                                                                                                                                                                                                                 |
|    |                                                                                  |                 |                                                                                                                                                                                                                                                                                                                                                                                                 |
| 13 | Other financial or non-financial interests                                       | <u> X </u> None | Although not directly related to the submitted work, KR is co-founder of Ardea Outcomes (DGI Clinical until 2021), which in the past 3 years has had contracts with pharma and device manufacturers (Danone, Hollister, INmune, Novartis, Takeda) on individualized outcome measurement. In 2020, on behalf of Ardea Outcomes, he attended an advisory board meeting with Nutricia on dementia. |
|    |                                                                                  |                 |                                                                                                                                                                                                                                                                                                                                                                                                 |
|    |                                                                                  |                 |                                                                                                                                                                                                                                                                                                                                                                                                 |

Please place an "X" next to the following statement to indicate your agreement:

X  I certify that I have answered every question and have not altered the wording of any of the questions on this form.

## ICMJE DISCLOSURE FORM

**Date:** 09/05/2024

**Your Name:** Claudia Cooper

**Manuscript Title:** Personalised goals of people living with dementia and family carers: a content analysis of goals set within an individually tailored psychosocial intervention trial.

**Manuscript number (if known):** \_ TRCI-D-23-00105

In the interest of transparency, we ask you to disclose all relationships/activities/interests listed below that are related to the content of your manuscript. “Related” means any relation with for-profit or not-for-profit third parties whose interests may be affected by the content of the manuscript. Disclosure represents a commitment to transparency and does not necessarily indicate a bias. If you are in doubt about whether to list a relationship/activity/interest, it is preferable that you do so.

The following questions apply to the author’s relationships/activities/interests as they relate to the current manuscript only.

The author’s relationships/activities/interests should be defined broadly. For example, if your manuscript pertains to the epidemiology of hypertension, you should declare all relationships with manufacturers of antihypertensive medication, even if that medication is not mentioned in the manuscript.

In item #1 below, report all support for the work reported in this manuscript without time limit. For all other items, the time frame for disclosure is the past 36 months.

|                                                           |                                                                                                                                                                                | Name all entities with whom you have this relationship or indicate none (add rows as needed) | Specifications/Comments (e.g., if payments were made to you or to your institution) |
|-----------------------------------------------------------|--------------------------------------------------------------------------------------------------------------------------------------------------------------------------------|----------------------------------------------------------------------------------------------|-------------------------------------------------------------------------------------|
| <b>Time frame: Since the initial planning of the work</b> |                                                                                                                                                                                |                                                                                              |                                                                                     |
| 1                                                         | All support for the present manuscript (e.g., funding, provision of study materials, medical writing, article processing charges, etc.)<br><b>No time limit for this item.</b> | Alzheimer’s Society [Grant number 330, AS-PR2-16-002)].                                      | Paid to the institution                                                             |
|                                                           |                                                                                                                                                                                |                                                                                              |                                                                                     |
|                                                           |                                                                                                                                                                                |                                                                                              |                                                                                     |
|                                                           |                                                                                                                                                                                |                                                                                              |                                                                                     |
|                                                           |                                                                                                                                                                                |                                                                                              |                                                                                     |
|                                                           |                                                                                                                                                                                |                                                                                              |                                                                                     |
| <b>Time frame: past 36 months</b>                         |                                                                                                                                                                                |                                                                                              |                                                                                     |
| 2                                                         | Grants or contracts from any entity (if not indicated in item #1 above).                                                                                                       | <u> X </u> None                                                                              |                                                                                     |
|                                                           |                                                                                                                                                                                |                                                                                              |                                                                                     |
| 3                                                         | Royalties or licenses                                                                                                                                                          | <u> X </u> None                                                                              |                                                                                     |
|                                                           |                                                                                                                                                                                |                                                                                              |                                                                                     |

|    |                                                                                                              |                   |  |
|----|--------------------------------------------------------------------------------------------------------------|-------------------|--|
|    |                                                                                                              |                   |  |
| 4  | Consulting fees                                                                                              | <u>  X  </u> None |  |
|    |                                                                                                              |                   |  |
|    |                                                                                                              |                   |  |
| 5  | Payment or honoraria for lectures, presentations, speakers bureaus, manuscript writing or educational events | <u>  X  </u> None |  |
|    |                                                                                                              |                   |  |
|    |                                                                                                              |                   |  |
| 6  | Payment for expert testimony                                                                                 | <u>  X  </u> None |  |
|    |                                                                                                              |                   |  |
|    |                                                                                                              |                   |  |
| 7  | Support for attending meetings and/or travel                                                                 | <u>  X  </u> None |  |
|    |                                                                                                              |                   |  |
|    |                                                                                                              |                   |  |
| 8  | Patents planned, issued or pending                                                                           | <u>  X  </u> None |  |
|    |                                                                                                              |                   |  |
|    |                                                                                                              |                   |  |
| 9  | Participation on a Data Safety Monitoring Board or Advisory Board                                            | <u>  X  </u> None |  |
|    |                                                                                                              |                   |  |
|    |                                                                                                              |                   |  |
| 10 | Leadership or fiduciary role in other board, society, committee or advocacy group, paid or unpaid            | <u>  X  </u> None |  |
|    |                                                                                                              |                   |  |
|    |                                                                                                              |                   |  |
| 11 | Stock or stock options                                                                                       | <u>  X  </u> None |  |
|    |                                                                                                              |                   |  |
|    |                                                                                                              |                   |  |
| 12 | Receipt of equipment, materials, drugs, medical writing, gifts or other services                             | <u>  X  </u> None |  |
|    |                                                                                                              |                   |  |
|    |                                                                                                              |                   |  |
| 13 | Other financial or non-financial interests                                                                   | <u>  X  </u> None |  |
|    |                                                                                                              |                   |  |
|    |                                                                                                              |                   |  |

Please place an "X" next to the following statement to indicate your agreement:

  X   I certify that I have answered every question and have not altered the wording of any of the questions on this form.
